# Supplementary material for: Enhancement of hole capture and water dissociation on rutile TiO2(110) by intermolecular hydrogen bonding: time-domain ab initio study
Source: Royal Society of Chemistry journal article supplement (doi:10.1039/d4ta04750h), 2024-01-01
Supplement: d4ta04750h1.pdf [file d4ta04750h1.pdf]

Supporting Information for

**Enhancement of Hole Capture and Water Dissociation on Rutile TiO<sub>2</sub>(110)  
by Intermolecular Hydrogen Bonding: Time-Domain Ab Initio Study**

Yitong Zhang<sup>1</sup>, Cheng Cheng<sup>2</sup>, Yifan Wu<sup>3</sup>, Oleg V Prezhdo<sup>3\*</sup>, Run Long<sup>1†</sup>

<sup>1</sup>*College of Chemistry, Key Laboratory of Theoretical & Computational Photochemistry of  
Ministry of Education, Beijing Normal University, Beijing 100875, People's Republic of  
China*

<sup>2</sup>*Center for Advanced Materials Research & Faculty of Arts and Sciences, Beijing Normal  
University, Zhuhai 519087, People's Republic of China*

<sup>3</sup>*Departments of Chemistry, and Physics and Astronomy, University of Southern California,  
Los Angeles, CA 90089, USA*

---

\* Corresponding author, E-mail: prezhdo@usc.edu

† Corresponding authors, email: runlong@bnu.edu.cn

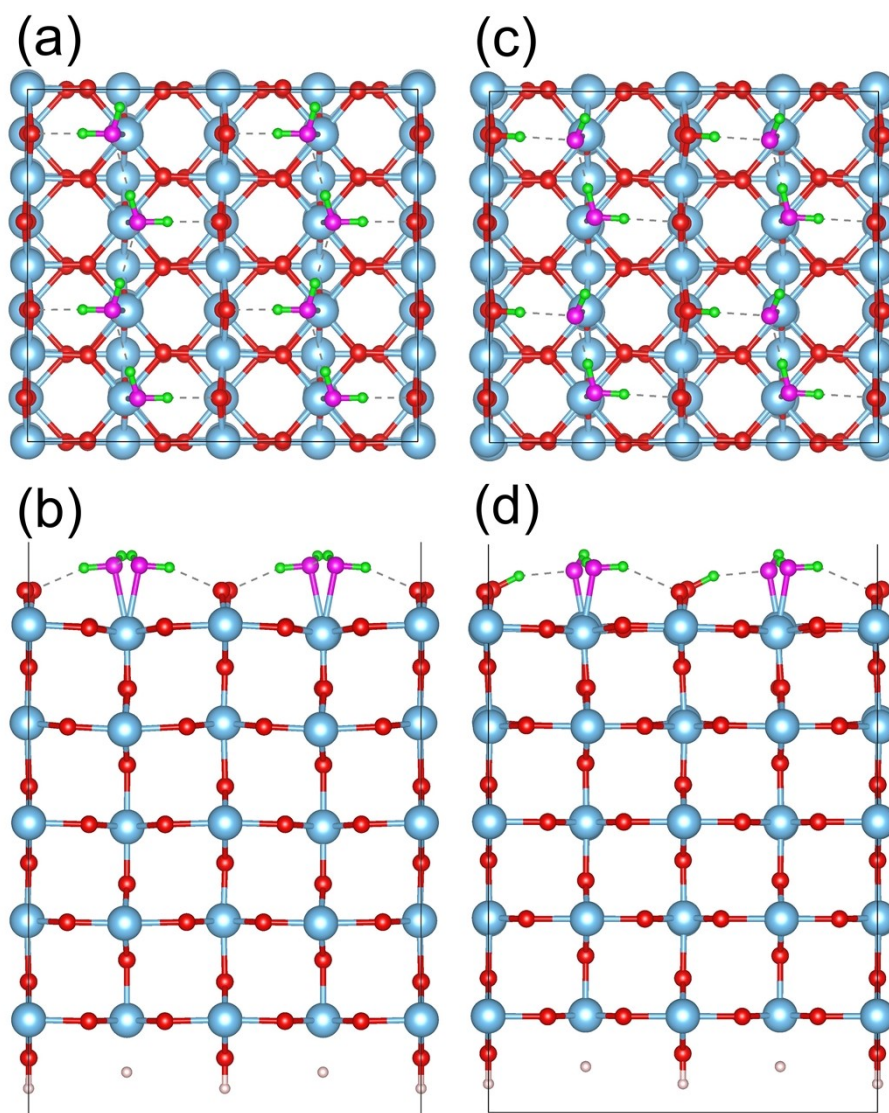

**Fig. S1** Adsorption of water molecules on the *p*-rutile TiO<sub>2</sub>(110) surface in the 2×2 supercell. **(a, c)** Top and **(b, d)** side views of **(a, b)** monolayer system and **(c, d)** semi-dissociated systems. The light blue and red balls represent Ti and O atoms in TiO<sub>2</sub>, respectively, while the pink and green balls represent the O and H atoms in water molecules, respectively.

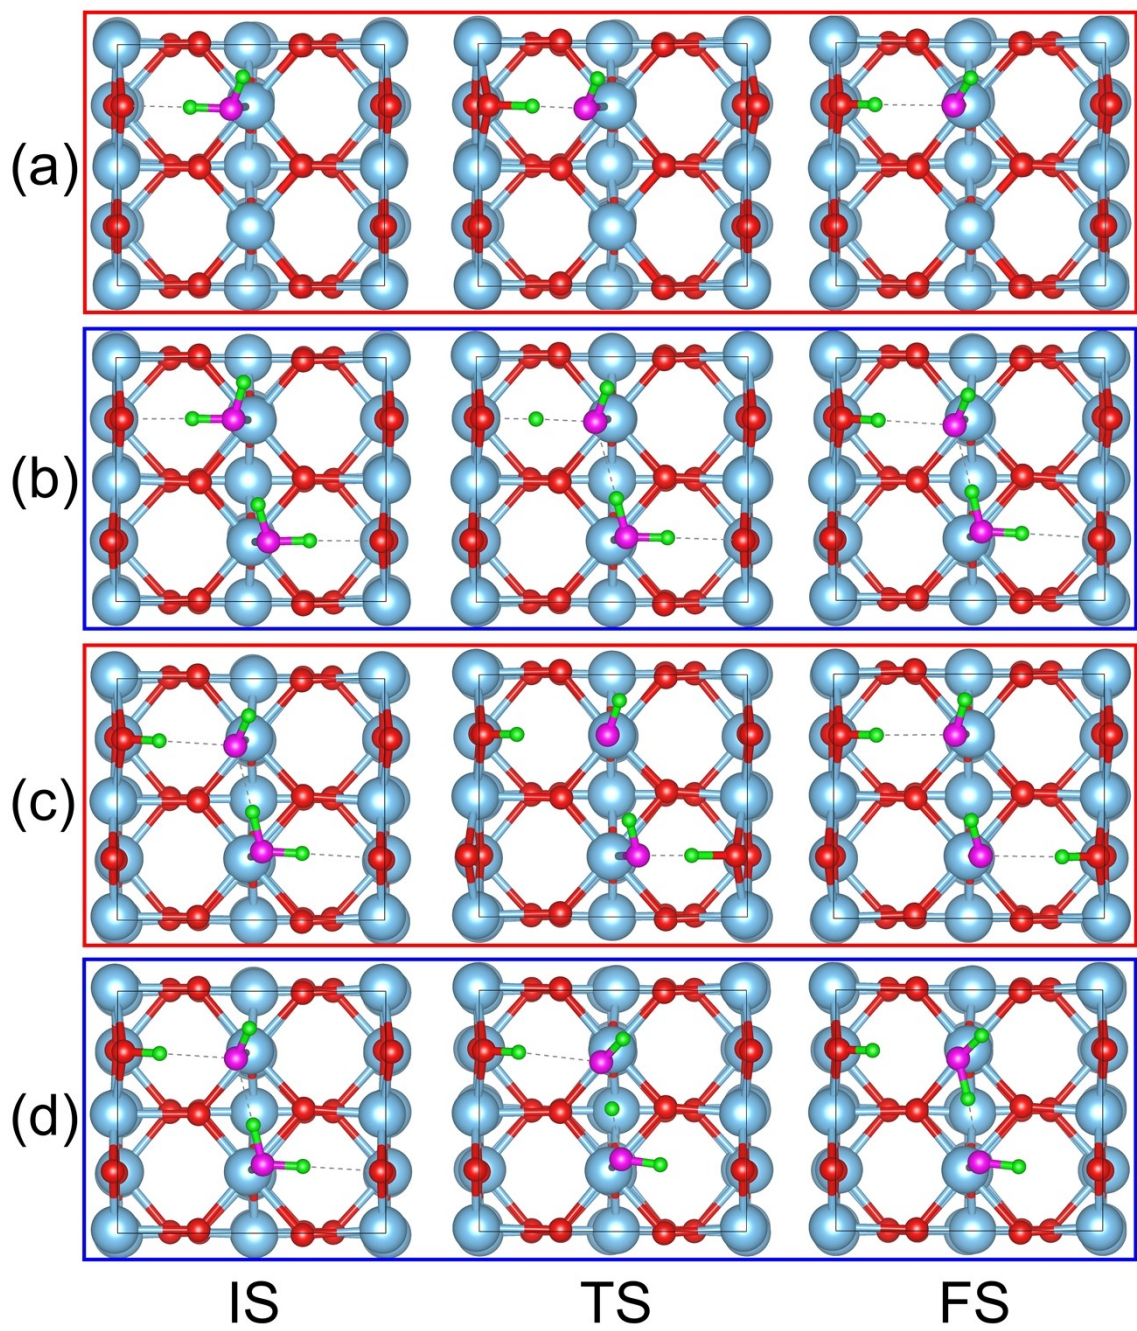

**Fig. S2** Enlarged views of the initial state (IS), transition state (TS), and final state (FS) structures corresponding to **Fig. 2**.

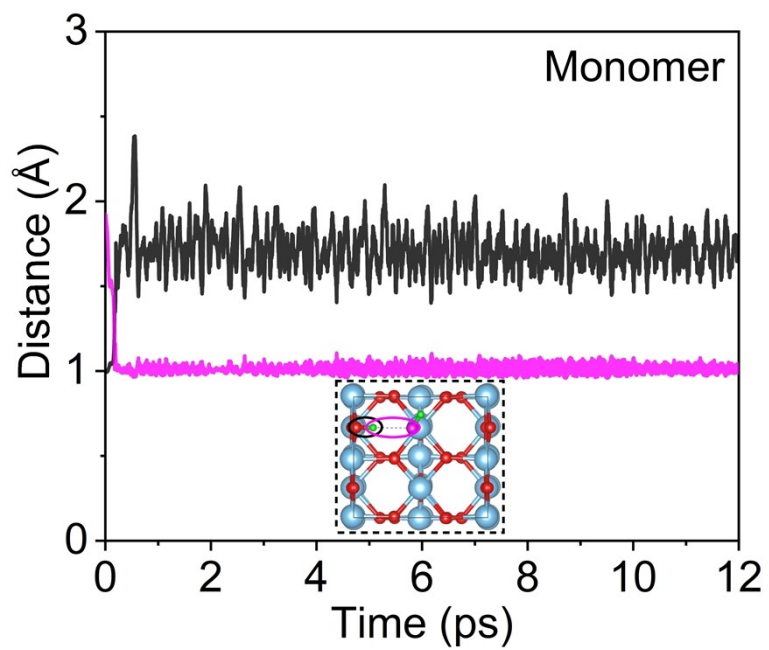

**Fig. S3** Evolution of the distances between the H atom and the adjacent O atoms during AIMD in the Monomer system. The evolution of the atomic distances reflects re-formation of the water molecule.

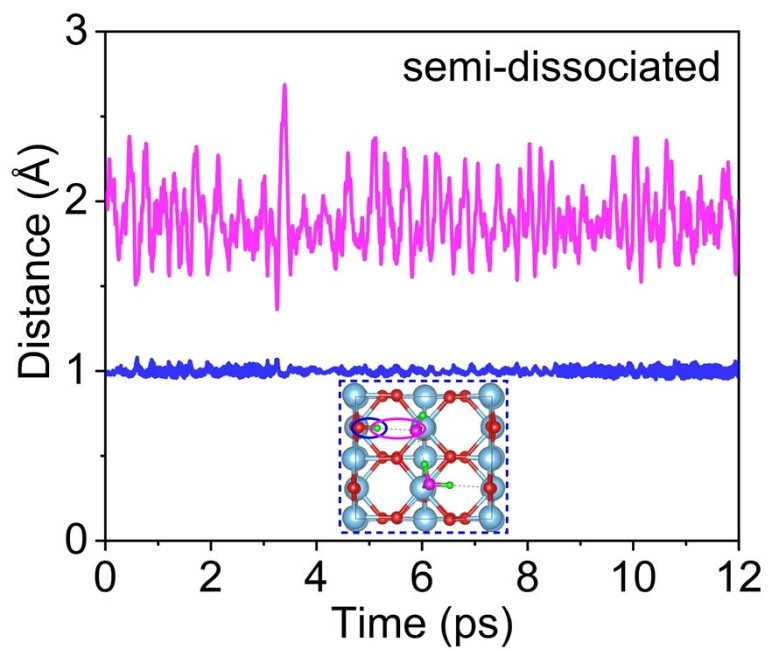

**Fig. S4** Evolution of the distances between the H atom and the adjacent O atoms during AIMD in the semi-dissociated system.

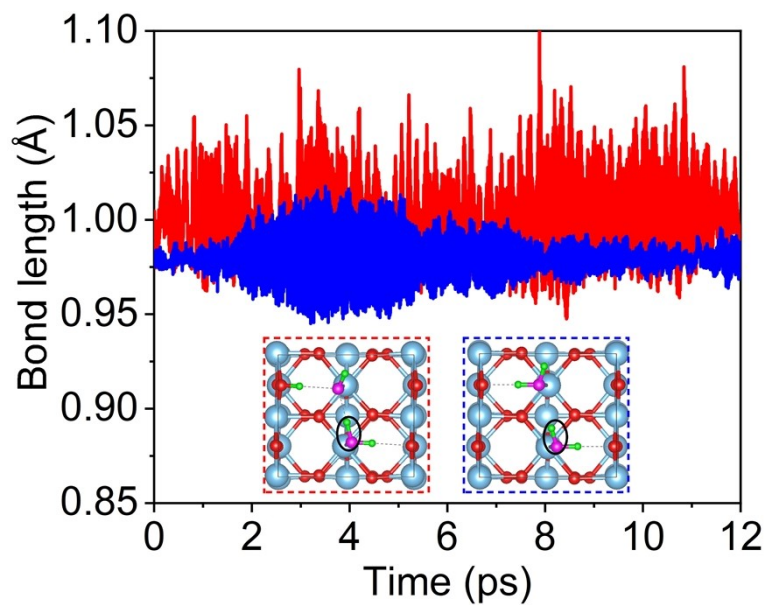

**Fig. S5** Evolution of the O-H bond length in the second water molecule H<sub>2</sub>O<sub>2</sub> during AIMD in the monolayer (blue) and semi-dissociated (red) systems.
